# Supplementary material
Source: PubMed Central journal article supplement (PMC3517695)
Supplement: NIHMS398556-supplement-01.pdf [file NIHMS398556-supplement-01.pdf]

**Table S1:** Minimal and multivariable\* adjusted odds ratios for the development of rapid decline in estimated glomerular filtration rate and incident stage 3 chronic kidney disease (CKD) using estimated glomerular filtration rate (eGFR) based on the Modification of Diet in Renal Disease (MDRD) Study Equation.

|                                      | ABI<br>>1.1 to <1.4 |          | ABI<br>>0.9 to 1.1 |          | ABI<br>≤0.9       |          |                 |
|--------------------------------------|---------------------|----------|--------------------|----------|-------------------|----------|-----------------|
|                                      | OR (95% CI)         | <i>p</i> | OR (95% CI)        | <i>p</i> | OR (95% CI)       | <i>p</i> | <i>p</i> -trend |
| <b>Rapid eGFR decline</b>            |                     |          |                    |          |                   |          |                 |
| Events/No. at Risk                   | 186/1719            |          | 108/822            |          | 15/51             |          |                 |
| Baseline age, sex, and eGFR-adjusted | 1.0 (ref)           | -        | 1.34 (0.97-1.87)   | 0.08     | 5.81 (2.65-12.71) | <0.0001  | 0.0004          |
| Multivariable-adjusted               | 1.0 (ref)           | -        | 1.30 (0.92-1.82)   | 0.14     | 4.30 (1.86-9.95)  | 0.0007   | 0.005           |
| <b>Incident stage 3 CKD**</b>        |                     |          |                    |          |                   |          |                 |
| Events/No. at Risk                   | 121/1625            |          | 85/ 755            |          | 13/40             |          |                 |
| Baseline age, sex, and eGFR-adjusted | 1.0 (ref)           | -        | 1.30 (0.94-1.80)   | 0.11     | 2.91 (1.35-6.28)  | 0.006    | 0.008           |
| Multivariable-adjusted               | 1.0 (ref)           | -        | 1.19 (0.85-1.67)   | 0.30     | 2.09 (0.94-4.68)  | 0.07     | 0.09            |

Abbreviations: ABI, ankle brachial index; CI, confidence interval; eGFR, estimated glomerular filtration rate

\* Adjusted for baseline age, sex, eGFR, and additionally for the following baseline Exam 6 covariates: body mass index, current smoking, diabetes, hypertension, high-density lipoprotein cholesterol

\*\* Defined as an eGFR<60mL/min/1.73m<sup>2</sup> at end of follow-up in participants with eGFR≥60mL/min/1.73m<sup>2</sup> at baseline.
