# Supplementary material
Source: PubMed Central journal article supplement (PMC3517695)
Supplement: NIHMS398556-supplement-02.pdf [file NIHMS398556-supplement-02.pdf]

**Table S2:** Baseline characteristics of the study sample according to ankle brachial index category in participants free of stage 3 chronic kidney disease at baseline\* (N=2426)

|                                                                                                |                        | Ankle Brachial Index |                 |
|------------------------------------------------------------------------------------------------|------------------------|----------------------|-----------------|
| Participant characteristic                                                                     | >1.1 to <1.4<br>n=1634 | >0.9 to 1.1<br>n=751 | ≤0.9<br>n=41    |
| Age (years)                                                                                    | 56 ± 8                 | 57 ± 9               | 64 ± 9          |
| Sex (% [n] women)                                                                              | 43.2 (706)             | 75.4 (566)           | 46.3 (19)       |
| Current smoking                                                                                | 11.3 (184)             | 19.4 (146)           | 46.3 (19)       |
| Body mass index (kg/m <sup>2</sup> )                                                           | 27.8 ± 4.7             | 27.7 ± 5.6           | 31.1 ± 8.1      |
| Total cholesterol (mg/dL)                                                                      | 203 ± 36               | 212 ± 38             | 203 ± 33        |
| High Density Lipoprotein Cholesterol (mg/dL)                                                   | 50 ± 15                | 55 ± 17              | 46 ± 14         |
| Systolic blood pressure (mm Hg)                                                                | 125 ± 17               | 128 ± 19             | 137 ± 19        |
| Diastolic blood pressure (mm Hg)                                                               | 76 ± 9                 | 75 ± 9               | 75 ± 11         |
| Hypertension                                                                                   | 32.9 (537)             | 38.0 (285)           | 68.3 (28)       |
| Diabetes                                                                                       | 6.8 (111)              | 6.8 (51)             | 19.5 (8)        |
| Prevalent cardiovascular disease                                                               | 6.3 (103)              | 7.6 (57)             | 22.0 (9)        |
| Estimated glomerular filtration rate (mL/min/1.73m <sup>2</sup> )                              | 90 ± 15                | 89 ± 16              | 87 ± 23         |
| Urinary albumin to creatinine ratio (Median [25 <sup>th</sup> , 75 <sup>th</sup> percentile])* | 5.2 [2.2-11.3]         | 7.3 [3.3-15.1]       | 12.4 [5.2-55.3] |
| Microalbuminuria                                                                               | 10.5 (171)             | 13.3 (100)           | 13 (31.7)       |

Note: Unless otherwise specified, dichotomous characteristics are presented % (n) and continuous characteristics are presented mean ± standard deviation. Conversion factors for units: total cholesterol and high-density lipoprotein cholesterol in mg/dL to mmol/L, x0.02586; estimated glomerular filtration rate in mL/min/1.73m<sup>2</sup> to mL/s/1.73m<sup>2</sup>, x0.01667.

\* Estimated glomerular filtration rate ≥60 mL/min/1.73m<sup>2</sup> at baseline based on the CKD-EPI equation

\*\* Urinary albumin to creatinine ratio available in n=1415 for ankle brachial index >1.1 to <1.4 (normal), in n=650 for ankle brachial index >0.9 to 1.1 (low-normal) and in n=31 with ankle brachial index ≤0.9 (low).
